1 **Motile ghosts of the halophilic archaeon,**  
2 ***Haloferax volcanii***

3 Yoshiaki Kinosita<sup>1,2,†,\*</sup>, Nagisa Mikami<sup>2</sup>, Zhengqun Li<sup>2</sup>, Frank Braun<sup>2</sup>, Tessa EF. Quax<sup>2</sup>,  
4 Chris van der Does<sup>2</sup>, Robert Ishmukhametov<sup>1</sup>, Sonja-Verena Albers<sup>2</sup> & Richard M. Berry<sup>1</sup>

5 <sup>1</sup>Department of Physics, University of Oxford, Park road OX1 3PU, Oxford, UK

6 <sup>2</sup>Institute for Biology II, University of Freiburg, Schaezle strasse 1, 79104 Freiburg,  
7 Germany

8 <sup>†</sup>Present address: Molecular Physiology Laboratory, RIKEN, Japan

9 \*Correspondence should be addressed to [yoshiaki.kinosita@gmail.com](mailto:yoshiaki.kinosita@gmail.com)

10 **Author Contributions:**

11 Y.K. and R.M.B designed the research. Y.K. performed all experiments and  
12 obtained all data; N.M. helped genetics, biochemistry, and preparation of figures;  
13 Z.L, F.B., T.EF.Q., C.v.d.D and S.-V. A. helped genetics; R.I helped the ghost  
14 experiments; N.M. and R.M.B helped microscope measurements; Y.K., and  
15 R.M.B. wrote the paper.

16

17

18

## 19 **Summary**

20 Motility is seen across all domains of life <sup>1</sup>. Prokaryotes exhibit various types of motilities,  
21 such as gliding, swimming, and twitching, driven by supramolecular motility machinery  
22 composed of multiple different proteins <sup>2</sup>. In archaea only swimming motility is reported,  
23 driven by the archaellum (archaeal flagellum), a reversible rotary motor consisting of a  
24 torque-generating motor and a helical filament which acts as a propeller <sup>3,4</sup>. Unlike the  
25 bacterial flagellar motor (BFM), adenosine triphosphate (ATP) hydrolysis probably drives  
26 both motor rotation and filamentous assembly in the archaellum <sup>5,6</sup>. However, direct  
27 evidence is still lacking due to the lack of a versatile model system. Here we present a  
28 membrane-permeabilized ghost system that enables the manipulation of intracellular  
29 contents, analogous to the triton model in eukaryotic flagella <sup>7</sup> and gliding *Mycoplasma*  
30 <sup>8,9</sup>. We observed high nucleotide selectivity for ATP driving motor rotation, negative  
31 cooperativity in ATP hydrolysis and the energetic requirement for at least 12 ATP  
32 molecules to be hydrolyzed per revolution of the motor. The response regulator CheY  
33 increased motor switching from counterclockwise (CCW) to clockwise (CW) rotation,  
34 which is the opposite of a previous report <sup>10</sup>. Finally, we constructed the torque-speed  
35 curve at various [ATP]s and discuss rotary models in which the archaellum has  
36 characteristics of both the BFM and F<sub>1</sub>-ATPase. Because archaea share similar cell  
37 division and chemotaxis machinery with other domains of life <sup>11,12</sup>, our ghost model will  
38 be an important tool for the exploration of the universality, diversity, and evolution of  
39 biomolecular machinery.

40 The archaeellar motor has no homology with the BFM, but is evolutionarily and  
41 structurally related to bacterial type IV pili (T4P) for surface motility<sup>3</sup>. In Euryarchaeota,  
42 the filament is encoded by two genes, *flgA* (*flaA* in *Methanococcus*) and *flgB* (*flaB* in  
43 *Methanococcus*), and the motor eight *flaC-J* (see Ref. 3 for details in Crenarchaeota).  
44 Euryarchaeota encode the full set of a chemotaxis system, *cheA*, *B*, *C*, *D*, *R*, *W*, and *Y*,  
45 like flagellated bacteria, which might have been acquired by horizontal gene transfer from  
46 *Bacillus/Thermotoga* groups<sup>11</sup>.

47 Figure 1a (top) shows the current association of functions with the motor genes, based  
48 on analysis of mutants and biochemical data: FlaC/D/E as switching proteins for the  
49 directional switch of archaeellum rotation coupled with the signals from the chemotaxis  
50 system<sup>13</sup>; FlaG and FlaF complex interacting with the surface layer (S-layer), with FlaF  
51 regulating FlaG filament assembly<sup>14,15</sup>; FlaH as a regulator of the switch between  
52 assembly of the archaeella and rotation<sup>16</sup>; FlaI as the ATP-driven motor for both assembly  
53 and rotation<sup>5</sup>; FlaJ as the membrane-spanning component. An inhibitor of proton  
54 translocating ATP synthases reduced both intracellular [ATP] and swimming speed in  
55 *Halobacterium salinarum*<sup>6</sup>, suggesting that archaeellar rotation is driven by ATP  
56 hydrolysis at FlaI. However, direct evidence is lacking due to the lack of a reconstituted  
57 system. There is also no direct evidence as to which components are anchored to the cell  
58 and which rotate with the filament: Figure 1b illustrates possibilities which we discuss  
59 below.

60 Here we present an *in vitro* experimental system for the archaeellum, similar to the  
61 Triton model for the eukaryotic flagellum<sup>7</sup> and the permeabilized ghost model for gliding  
62 *Mycoplasma mobile*<sup>8,9</sup>. We use the halophilic archaeon *Haloferax volcanii*. *Hfx. volcanii*  
63 possesses multiple polar archaeella and swims at 2-4  $\mu\text{m s}^{-1}$  at room temperature, with CW

64 rotation more efficient for propulsion than CCW (Fig. 1c *top*, Supplementary Result 1  
65 and Supplementary Video 1)<sup>17</sup>. We increased the fraction of swimming *Hfx. volcanii* cells  
66 from 20-30 % to 80 % by adding 20 mM CaCl<sub>2</sub> (Supplementary Figure 1a).

67 To prepare our experimental model system, we suspended motile cells in buffers  
68 containing detergent (0.015 % sodium cholate) and 2.5 mM ATP (Fig. 1d). Fluorescent  
69 imaging revealed that ghosts still possessed archaellar filaments, the cell membrane, and  
70 S-layer (Fig. 1c *bottom* and Supplementary Figure 2). The detergent reduced the refractive  
71 index of cells, indicating permeabilization of the cell membrane and corresponding loss  
72 of cytoplasm. Remarkably, the permeabilized cells still swam (Supplementary Video 2  
73 and Fig. 1d *lower right*). We named them “ghosts,” as in similar experiments on  
74 *Mycoplasma mobile*<sup>9</sup>. Fig. 1e shows a typical example of a live swimming cell changing  
75 to a ghost, marked by a sudden change of image density at 8.75 sec. The solution  
76 contained 2.5 mM ATP and the swimming speed did not change dramatically when this  
77 cell became a ghost (Fig. 1f, see Supplementary Figure 3a for another example). Fig. 1g  
78 shows histograms of swimming speeds of cells, before and after adding detergent,  
79 indicating that ghosts swim at the same speed as live cells in this, saturating, ATP  
80 concentration ( $P = 0.421834 > 0.05$  by *t*-test, ratio  $0.93 \pm 0.24$ ,  $n = 24$ , Supplementary  
81 Figure 3b). Wild-type ghosts showed a single speed peak around  $1.5 \mu\text{m s}^{-1}$  in detergent  
82 (Fig. 1g, bottom), in contrast to peaks at  $\sim 1.7$  and  $3 \mu\text{m s}^{-1}$  for the same cells without  
83 detergent (Supplementary Figure 1b). If CW rotation is associated with the faster peak<sup>17</sup>,  
84 and is suppressed by detergent, this is consistent with our lack of observation of CW  
85 rotation of beads in the presence of detergent (see below). The lack of the  $3 \mu\text{m s}^{-1}$  peak  
86 in cells lacking CheY ( Fig. 1g, *top* and Supplementary Figure 4) would then indicate that  
87 CheY is required for CW rotation, as in the bacterial flagellar motor<sup>18</sup>. However, we

88 found it difficult to track swimming ghosts due to their low contrast, and were not able to  
89 determine the direction of archaellar filament rotation.

90 To overcome these difficulties, we established a ghost-bead assay for measuring ATP-  
91 coupled motor rotation (Fig. 2a). We attached cells with sheared, biotinylated archaellar  
92 filaments nonspecifically to the cover glass surface, and then introduced 500 nm  
93 streptavidin beads which attached to the filaments (Material and Methods and  
94 Supplementary Result 2). Addition of 0.1 mg ml<sup>-1</sup> streptavidin (which would crosslink  
95 adjacent filaments in a rotating bundle) did not stop bead rotation, indicating that shearing  
96 removed most filaments and rotating beads are attached to a single archaellum<sup>19</sup>  
97 (Supplementary Video 3). For the preparation of ghosts, live cells labelled with rotating  
98 beads were treated in a flow chamber with detergent (0.03 % sodium cholate, as for  
99 swimming cells) for less than 30 sec to permeabilize their cell membrane, and  
100 subsequently the detergent was replaced with buffer containing ATP. Motor rotation was  
101 stopped by permeabilization and reactivated by the addition of ATP (Supplementary  
102 Video 4, Fig. 2b). Although beads on ghost cells rotated only CCW in the presence of  
103 detergent (n = 11, see Supplementary Result 3 and Supplementary Figure 7), we observed  
104 both directions of rotation after detergent removal (Fig. 2c). We did not see any  
105 differences between CW and CCW rotation rates (Supplementary Figure 8) and therefore  
106 analyzed speeds collectively.

107 We next investigated the effect of different nucleotide triphosphates (NTPs). Previous  
108 *in vitro* experiments showed that purified FlaI hydrolyzes different NTPs at similar rates  
109<sup>20</sup>. However, the archaellar rotational rates in ghosts in 10 mM GTP, CTP, and UTP were  
110 5-10 times slower than in ATP (Fig. 2d). This suggests that the motor complex might  
111 increase the selectivity of FlaI for nucleotides and/or prevent extra energy consumption

112 *in vivo* like the endopeptidase Clp (see Fig. 1B in Ref. 21). We also tested the inhibitory  
113 effects on rotation of ADP, ADP+Pi, and the non-hydrolysable ATP analog ATP- $\gamma$ -S  
114 (adenosine 5'-[ $\gamma$ -thio]triphosphate). We saw no rotation with ATP- $\gamma$ -S alone. We  
115 measured the rotation rates of 500 nm beads attached to archaella in ghosts over a range  
116 of [ATP] between 63  $\mu$ M and 10 mM, with and without each of ADP (2 mM) , ADP+Pi  
117 (each 2mM) and ATP- $\gamma$ -S (0.5 mM). Figure 2e shows the results as a Lineweaver-Burk  
118 plot. All 3 caused large reduction of rotation rates at lower [ATP], but much smaller  
119 reductions of  $f_{\max}$ , indicating competitive inhibition. The inhibitor constants,  $K_i$ , were  
120 estimated to be 1.94 mM for ADP (Ocher), 1.22 mM for ADP.Pi (Green), and 0.11 mM  
121 for ATP- $\gamma$ -S (Blue). We also observed modest effects of pH, and ion concentration on  
122 rotation (Supplementary Result 4).

123 Although we expected bi-directional rotational to be mediated by the response regulator  
124 CheY<sup>10</sup>, live cells without CheY were observed to rotate in either direction, without  
125 switching during our typical recording time of 30 s ( $n = 5$  for CW rotation,  $n = 76$  for  
126 CCW rotation). To observe the role of archaeal CheY in motor switching, we extended  
127 our recording time to 300 s. Switching from CCW to CW rotation was frequent in wild  
128 type live cells, but rare in  $\Delta$ CheY live cells even during 5 min recordings (Fig. 3 and  
129 Supplementary Figure 10). Wild type ghosts still switched, but the bias and fraction of  
130 switching cells were changed, suggesting the chemotaxis system was still active, but  
131 altered (Supplementary Table 3).

132 Figure 4a shows the dependence of rotation speed ( $f$ , revs per second) of 200, 500, and  
133 970 nm beads upon [ATP] in the range 8  $\mu$ M to 10 mM. Michaelis-Menten fits to the data  
134 (solid lines) are poor below 30  $\mu$ M ATP. Figure 4b shows the relationship between  
135  $\log([ATP])$  and  $\log(f / (f_{\max} - f))$ , where  $f_{\max}$  is estimated by Michaelis-Menten plot (Fig.

136 4a), and the slope represents Hill coefficients of 0.63, 0.82 and 0.89 for 200 nm, 500 nm,  
137 970 nm beads respectively. This result indicates negative cooperativity in ATP-driven  
138 archaellar rotation, (see below for discussion). Figure 4c shows the relationships between  
139 torque, speed and [ATP] for archaellar rotation. The maximum motor torque was  
140 estimated to be ~200 pN nm for live cells and ~170 pN nm for ghosts, comparable to *Hbt.*  
141 *salinarum* live-cell experiments (160 pN nm)<sup>22</sup>.

142 Our estimated maximum torque of ~170 pN nm corresponds to the motor doing work  
143 for a single rotation ( $2\pi T$ , ~1000 pN nm) equivalent to the free energy of hydrolysis of  
144 ~12 ATP molecules per revolution, assuming the free energy of 80-90 pN nm per ATP  
145 molecule. Conservation of energy therefore sets a lower limit of 12 /rev/motor on the ATP  
146 hydrolysis rate, ~15 times higher than that measured *in vitro* for FlaI<sup>23</sup>. This indicates  
147 that motor assembly enhances ATPase activity in the archaellum, as observed in other  
148 systems; for example the PilC-PilT interaction in T4P<sup>24</sup> and  $\beta$ - and  $\gamma$ -subunit interaction  
149 in F<sub>1</sub>-ATPase<sup>25</sup>. Hydrolysis of 12 ATP molecules per revolution is consistent with  
150 previous reports<sup>22</sup> and with models of a 2-fold FlaJ rotor rotating within a 6-fold FlaI  
151 ATPase<sup>22,26</sup>.

152 Negative cooperativity in archaellar rotation at low [ATP] (Fig. 4a-b) might be explained  
153 by a mechanism similar to that proposed for F<sub>1</sub>-ATPase, where bi-site and tri-site  
154 hydrolysis correspond to nucleotide occupancy of the three catalytic sites alternating  
155 between 1 and 2 or between 2 and 3 or three, respectively<sup>27</sup>, and the hydrolysis rate is  
156 slower when only 1 site is occupied. In this scenario, negative cooperativity would be the  
157 result of the same interactions within the FlaI hexamer that power rotation<sup>22,26</sup>. Negative  
158 cooperativity could also arise from communication between FlaI and FlaH rings, similar  
159 to inter-ring effects in chaperonins<sup>28</sup>. Although FlaH has only the Walker A motif, ATP

160 binding is known to modulate the interaction between hexameric rings of FlaI and FlaH  
161 <sup>16</sup>.

162 Our finding that the time-averaged motor torque decreases with increasing speed at low  
163 loads (Fig. 4c) differs from a previous report<sup>22</sup>, which assumed constant torque  
164 irrespective of viscous load and speed, and explained the observed speed variations by  
165 assuming an extra contribution to the viscous drag from an unseen remnant of the filament.  
166 The required length of these remnants ( $\xi$ , 0.8 pN nm s) would be about 4  $\mu\text{m}$  <sup>22</sup>, which  
167 seems unlikely given our observation that most filaments are removed by shearing. The  
168 curves in figure 4c are qualitatively similar to those reported for the BFM with varying  
169 ion-motive force <sup>29</sup>. By contrast, the equivalent data for F<sub>1</sub>-ATPase correspond to  
170 Michaelis-Menten kinetics and torque that decreases linearly with increasing speed (see  
171 Fig. 2 in Ref. <sup>30</sup>). Simple models for the torque-speed relationships, similar to those  
172 applied to the BFM <sup>29,31</sup>, <sup>29,31</sup> and high-resolution detection of steps in rotation <sup>32</sup> using  
173 gold nanoparticles <sup>30,33</sup> may reveal the details of the rotation mechanism of the archaellum  
174 in future.

175 So far, there is no direct evidence as to which components of the archaellum are fixed  
176 relative to the cell (“stator”) and which rotate with the filament (“rotor”). FlaF and G are  
177 most likely part of the stator, anchored to the S-layer. Previous reports indicate interaction  
178 between FlaF and the S-layer and a deficiency in swimming motility of S-layer deleted  
179 cells <sup>14,15</sup>. Our observations of increased motility with [CaCl<sub>2</sub>] and the speed fluctuations  
180 at low [CaCl<sub>2</sub>] (Supplementary Figures 1 and 9), given that calcium stabilizes S-layer <sup>34</sup>,  
181 support this hypothesis. Homology to F<sub>1</sub>-ATPase and T4P are generally taken to favour a  
182 model where rotation of a FlaJ dimer within the central core of the FlaI hexamer is driven  
183 by cyclic changes in the conformation of the FlaI hexameric ATPase, coupled to ATP



184 hydrolysis<sup>22,26</sup>. In this model, FlaJ is the rotor and all other motor components are the  
185 stator (Figure 1b, left). For switching, changes caused by CheY binding, presumably  
186 somewhere on FlaC/D/E, would have to propagate all the way to the core of FlaI, which  
187 would need separate mechanochemical cycles for CW and CCW rotation. Figure 1b, right,  
188 illustrates the other extreme possibility, most similar to the BFM. In this model,  
189 conformational changes in FlaI would push on FlaF/G, either directly or via FlaC/D/E. In  
190 the latter case, the switch mechanism could reside within FlaC/D/E and FlaI need not  
191 have separate modes for CW and CCW rotation. Intermediate models are also possible  
192 (Figure 1b, middle). Our ghost model may allow labelling of archaeellar components to  
193 observe directly which are part of the rotor<sup>35,36</sup>, analysis of rotational steps as in isolated  
194 F<sub>1</sub> and other molecular motors<sup>30,37,38</sup>, and direct investigations of the role of CheY.

195 Our finding that archaeal CheY increases CW bias (Fig. 3) is inconsistent with previous  
196 reports<sup>10</sup> that the role of archaeal CheY in *Hbt. salinarum* enhances switching from CW  
197 to CCW rotation, as revealed by a dark-field microscopy of swimming cells<sup>10,39</sup>. This  
198 study measured static filaments to be right-handed in *Hbt. salinarum* M175, and inferred  
199 from this that CW rotation propels a cell forward, CCW backwards. We speculate that the  
200 contradictory result might be due to misinterpretation of filament helicity caused by errors  
201 in accounting for reflections in the microscope optics - cryo-EM data show left-handed  
202 helicity in *Hbt. salinarum* M175, supporting our conclusion<sup>40</sup>. With due care to account  
203 for reflections in our microscope (Supplementary figure 6), our bead assay is a direct  
204 observation of the rotational direction of the motor.

205 Our ghost assay represents the first experimental system that allows manipulation of the  
206 thermodynamic driving force for an archaeal molecular motor, following previous  
207 examples including eukaryotic linear motors<sup>41</sup>, the PomAB-type BFM<sup>38</sup>, and

208 *Mycoplasma* gliding motor<sup>9</sup>. We anticipate that this assay will be helpful for other  
209 biological systems. Archaea display chemotactic and cell division machinery acquired by  
210 horizontal gene transfer from bacteria<sup>11,12</sup>. Although the archaeellum and bacterial  
211 flagellum are completely different motility systems, they share common chemotactic  
212 proteins. Theoretically, only our ghost technique allows monitoring of the effect of  
213 purified CheY isolated from different hosts on motor switching. Similarly, our ghost cells  
214 offer the potential to manipulate and study the archaeal cell division machinery as with  
215 *in vitro* ghost models of *Schizosaccharomyces pombe*<sup>42</sup>. Ghost archaea offer the  
216 advantages of both *in vivo* and *in vitro* experimental methods and will allow the exploration  
217 of the universality, diversity, and evolution of biomolecules in microorganisms.  
218  
219

## 220 **Material and Methods**

### 221 **Strain and Cultivation**

222 Strains, plasmids, and primers are summarized in Supplementary Table 1, 2. *Haloferax*.  
223 *volcanii* (*Hfx. volcanii*) cells were grown at 42°C on a modified 1.5 % Ca agar plate (2.0  
224 M NaCl, 0.17 M Na<sub>2</sub>SO<sub>4</sub>, 0.18 M MgCl<sub>2</sub>, 0.06 M KCl, 0.5% (wt/vol) casamino acid,  
225 0.002% (wt/vol) biotin, 0.005% (wt/vol) thiamine hydrochloride, 0.01% (wt/vol) L-  
226 tryptophane, 0.01% (wt/vol) uracil, 10 mM HEPES-NaOH (pH 6.8) and 1.5% (wt/vol)  
227 Agar). Note that 20 mM CaCl<sub>2</sub> should be added (Supplementary Result 1). Colonies were  
228 scratched by the tip of a micropipette and subsequently suspended in 5ml of Ca liquid  
229 medium. After 3h incubation at 37°C, the culture was centrifuged at 5,000 r.p.m and  
230 concentrated to 100 times volume. The 20 µl culture was poured into 25-ml fresh Ca  
231 medium and again grown for 21 h with shaking of 200 r.p.m at 40°C. The final of an  
232 optical density would be around 0.07.

233 Gene manipulation based on selection with uracil in  $\Delta pyrE2$  strains was carried out with  
234 PEG 600, as described previously<sup>43</sup>. For the creation of KO strains, plasmids based on  
235 pTA131 were used carrying a *pyrE2* cassette in addition to ~1000-bp flanking regions of  
236 the targeted gene. *flgA1(A124C)* was expressed by tryptophane promotor (Supplementary  
237 Result 2).

### 238 **Preparation of biotinylated cells**

239 The culture of *Hfx. volcanii* Cys mutant was centrifuged and suspended into buffer A (1.5  
240 M KCl, 1 M MgCl<sub>2</sub>, 10 mM HEPES-NaOH pH 7.0). Cells were chemically modified with  
241 1 mg ml<sup>-1</sup> biotin-PEG2-maleimide (Thermo Fischer) for 1 h at room temperature, and  
242 excess biotin was removed with 5,000 g centrifugation at R.T for 4 min.

243 **Motility assay on soft-agar plate**

244 A single colony was inoculated on a 0.25% (wt/vol) Ca-agar plate and incubated at 37°C  
245 for 3-5 days. Images were taken with a digital camera (EOS kiss X7; Canon).

246 **Microscopy**

247 All experiments were carried under an upright microscope (Eclipse Ci; Nikon) equipped  
248 with a 40× objective (EC Plan-Neofluar 40 with Ph and 0.75 N.A.; Nikon) or 100×  
249 objective, a CMOS camera (LRH1540; Digimo). Images were recorded at 100 fps for 10-  
250 30 sec. For a motility experiment at 45°C, a phase-contrast microscope (Axio Observer;  
251 Zeiss) equipped with a 40× objective (EC Plan-Neofluar 40 with Ph and 0.75 N.A.; Zeiss),  
252 a CMOS camera (H1540; Digimo), and an optical table (Vision Isolation; Newport) were  
253 used.

254 For fluorescent experiment, a fluorescent microscope (Nikon Eclipse Ti; Nikon)  
255 equipped with a 100× objective (CFI Plan Apo 100 with Ph and 1.45 N.A.; Nikon), a laser  
256 (Nikon D=eclipse C1), an EMCCD camera (ixon<sup>+</sup> DU897; Andor), and an optical table  
257 (Newport) were used. The dichroic mirror and emitter were Z532RDC (C104891,  
258 Chroma) and 89006-ET-ECFP/EYFP/mcherry (Chroma) for an FM4-64 experiment,  
259 Z442RDC (C104887, Chroma) and 89006-ET-ECFP/EYFP/mcherry for an S-layer  
260 experiment, and Z442RDC and ET525/50m (Chroma) for a Dylight488 experiment.

261 **Construction of swimming ghosts**

262 The flow chamber was composed of a 22×22 coverslip and slide glass. Two pieces of  
263 double-sided tape, cut to a length of ~30 mm, were used as spacers between coverslips  
264 <sup>17</sup>. Two tapes were fixed with a ~5 mm interval, and the final volume was ~15 µl. The  
265 glass surface was modified with a Ca medium containing 5 mg ml<sup>-1</sup> bovine serum

266 albumin (BSA) to avoid cells attaching to a glass surface.

267 To construct swimming ghosts, 10  $\mu$ l of cell culture in Ca medium and buffer B (2.4 M  
268 KCl, 0.5 M NaCl, 0.2 M MgCl<sub>2</sub>, 0.1 M CaCl<sub>2</sub>, 10 mM HEPES-NaOH pH 7.2) containing  
269 1 mg ml<sup>-1</sup> DNase, 5 mM ATP (A2383, Sigma Aldrich), and 0.03 % sodium cholate  
270 (Sigma Aldrich) was mixed in an Eppendorf tube. Subsequently, the 20  $\mu$ l mixture was  
271 infused into the flow chamber.

272 Phase-contrast images were captured at 20 frames s<sup>-1</sup> for 15 sec. Swimming trajectories  
273 were determined by the centroid positions of cells and subjected to analysis using Igor  
274 pro. Given the trajectory of cells,  $\mathbf{r}(t) = [x(t), y(t)]$ , the swimming velocity  $\mathbf{v}(t)$  was  
275 defined as  $\mathbf{v}(t) = \frac{\mathbf{r}(t + \Delta t) - \mathbf{r}(t)}{\Delta t}$ .

## 276 **Bead assay**

277 For the observation of a rotational bead attached to an archaeellar filament, archaeellar  
278 filaments were sheared by 30 times pipetting with 200  $\mu$ l pipette (F123601, Gilson),  
279 infused into a flow chamber and kept for 10 min. Streptavidin-conjugated fluorescent  
280 beads (200 nm (F6774, Molecular probes), 500 nm (18720, Polysciences) or 970 nm  
281 (PMC 1N, Bangs lab)) in buffer B (2.4 M KCl, 0.5 M NaCl, 0.2 M MgCl<sub>2</sub>, 0.1 M CaCl<sub>2</sub>  
282 10 mM HEPES-NaOH pH 7.2, 0.5 mg ml<sup>-1</sup> BSA (Sigma Aldrich)) were added into the  
283 flow chamber, incubated for 15 min, and then rinsed with buffer to remove unbound beads.  
284 The solution was replaced to buffer B containing 0.03 % sodium cholate hydrate (C1254,  
285 Sigma Aldrich) and 1 mg ml<sup>-1</sup> DNase. When the optical density of cells was decreased,  
286 buffer B was replaced with buffer A containing ATP. Rotary ghosts were prepared within  
287 1 min (Fig. 2b). For pH measurements, the following buffer was used: Bis-Tris HCl for  
288 pH5.7 and 6.1 experiments; HEPES-NaOH for a pH8.0 experiment; and Tris-HCl for  
289 pH8.6 and pH9.3 experiments (Supplementary Figure 9). For nucleotides experiments,

290 ADP (A2754, Sigma Aldrich), ATP- $\gamma$ -S (A1388, Sigma Aldrich), GTP (ab146528,  
291 Abcam), CTP (R0451, Thermo Fischer Scientific), and UTP (R0471, Thermo Fischer  
292 Scientific) were used. Most data were collected at 100 frames s<sup>-1</sup> for 10 sec.

293 Bead position was determined by centroid fitting, giving cell trajectories,  $\mathbf{r}(t) = [x(t),$   
294  $y(t)]$ . The rotation rate was determined from either Fourier transform analysis (Fig. 2b) or  
295 a fit with a linear function to time course of bead rotation. (Fig. 2c). The rotational torque  
296 against viscous drag was estimated as  $T = 2\pi f \zeta$ , where  $f$  is rotational speed and  $\zeta =$   
297  $8\pi\eta a^3 + 6\pi\eta ar^2$  the viscous drag coefficient, with  $r$  the radius of rotation (major axis of  
298 ellipse),  $a$  the bead radius, and  $\eta$  the viscosity. We neglected the viscous drag of filaments  
299 <sup>22</sup>, which is expected to be negligible compared to these beads <sup>44</sup>.

300 To measure the viscosity of the medium, we tracked diffusing fluorescent beads for 30  
301 sec at 100 fps and performed an analysis of their mean-squared displacement versus time.  
302 From this analysis, the viscosities are estimated to be 0.0025 Pa·s in buffer, 0.0039 Pa·s  
303 in buffer + ficoll 5 %, and 0.0072 Pa·s in buffer + ficoll 10 % at 25 °C, which are slightly  
304 higher than a previous estimate <sup>22</sup>. We inferred that this discrepancy might be due to the  
305 proximity of the glass surface <sup>45</sup>.

### 306 **Fluorescent experiments**

307 For visualization of archaeellar filaments, biotinylated cells were subsequently incubated  
308 with 0.1 mg ml<sup>-1</sup> Dylight488-streptavidin (21832, Invitrogen) for 3 min, washed by  
309 centrifugation, and resuspended.

310 FM4-64 (F34653, Life Sciences) was used to stain the archaeal cell membrane. The  
311 powder was dissolved by buffer B (1.5 M KCl, 1 M MgCl<sub>2</sub>, 10 mM HEPES-NaOH pH  
312 7.0), and the cells were incubated for 30 min. The extra dye was removed by  
313 centrifugation. For microscopic measurements, the glass surface was cleaned using a

314 plasma cleaner (PDC-002; Harrick plasm).

315 Quantum dots 605 (Q10101MP, Invitrogen) was used to stain the archaeal cell surface,

316 S-layer<sup>17</sup>. Cells were biotinylated with biotin-NHS-ester (21330, ThermoFisher) and

317 incubated for 15 min at R.T. Extra biotin was washed by centrifugation. Biotinylated cells

318 were subsequently incubated with the buffer containing QD605 at a molar ratio of 400:1

319 for 3 min, washed by centrifugation, and resuspended.

320

321 **Acknowledgements**

322 We thank Prof. Achillefs Kapanidis and Dr. Abhishek Mazumder for sharing  
323 chemicals, Dr. Nariya Uchida for sharing his useful information in the torque  
324 calculation, and Dr. Mitsuhiro Sugawa for the technical advice in the microscope  
325 measurement. This study was supported in part by a grant from the Funding  
326 Program for the Biotechnology and Biological Sciences Research Council (to  
327 R.M.B), Collaborative Research Center Grant from the Deutsche  
328 Forschungsgemeinschaft (to S-V.A.). Y.K was recipient of the Japan Society for  
329 the Promotion of Science Postdoctoral Fellowship for Research Abroad and the  
330 Uehara Memorial Foundation postdoctoral fellow, and N.M. was recipient of the  
331 Yoshida Scholarship Foundation.

332 **Conflict of interest**

333 The authors declare no competing interests.

334

335

336



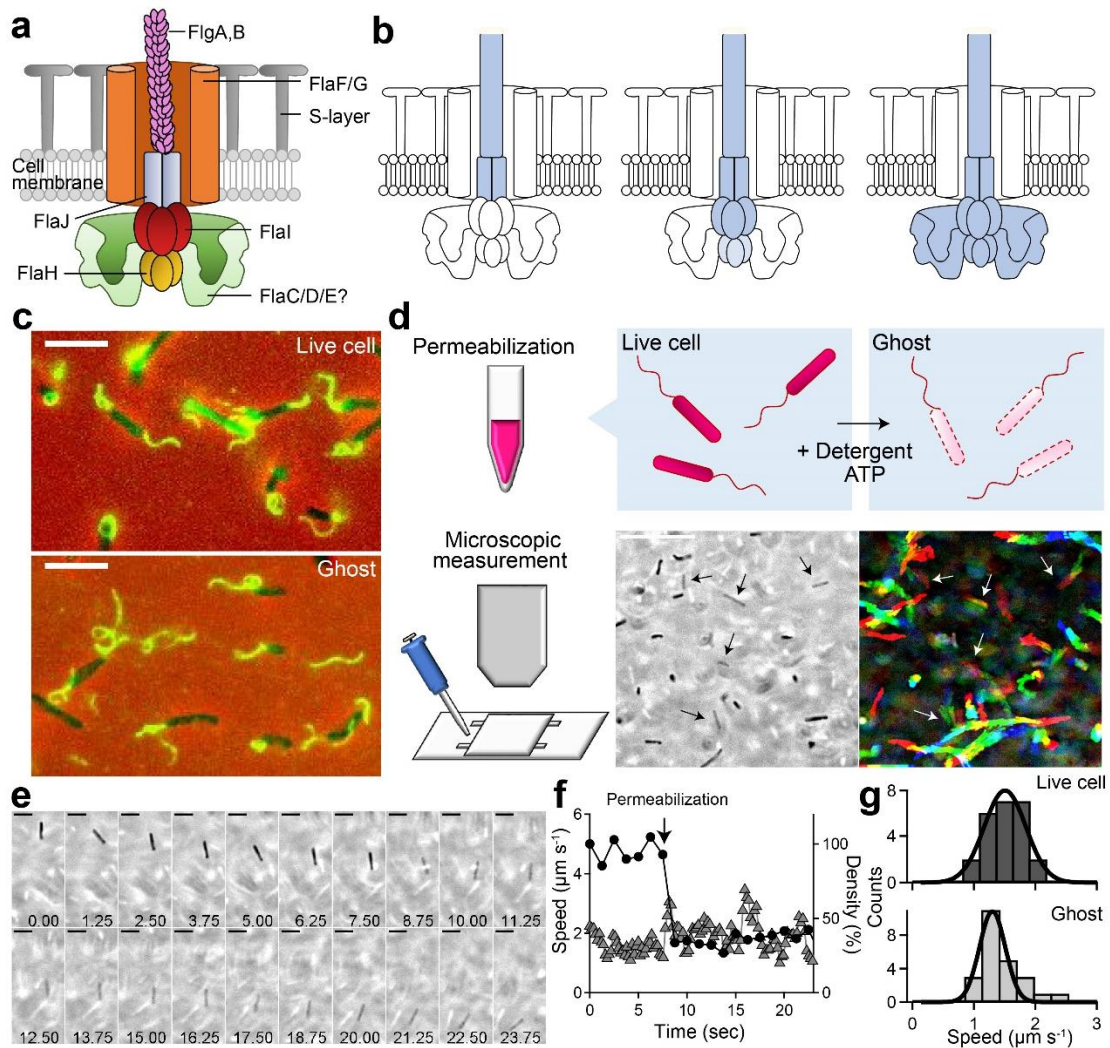

337

## 338 Figure 1 Swimming ghosts

339 (a) The current model of the archaeellar motor in Euryarchaeota (details in main  
 340 text). (b) Different possibilities for which components of the archaellum are fixed  
 341 relative to the cell (stator, white) and which rotate with the filament (rotor, blue).  
 342 Details are described in the main text. (c) Merged phase-contrast and fluorescent  
 343 images of live cells (*top*) and ghosts (*bottom*) labeled with streptavidin-dylight488  
 344 which binds to biotinylated filaments. (d) Procedures to observe swimming ghosts.  
 345 Live cells were permeabilized in a tube, then induced into a flow chamber to  
 346 observe swimming motility. *Lower middle*: Phase-contrast image. Black arrows

347 indicate ghosts. Scale bar, 10  $\mu\text{m}$ . Lower right: Sequential images with 0.5-s  
348 intervals, integrated for 30 sec with the intermittent color code “red  $\rightarrow$  yellow  $\rightarrow$   
349 green  $\rightarrow$  cyan  $\rightarrow$  blue.” White arrows indicate trajectories of ghosts. (e)  
350 Sequential images of a change from a live cell to ghost. Scale bar, 5  $\mu\text{m}$ . (f) Time  
351 course of swimming speed (triangles) and cell optical density (circles) from (d).  
352 Arrow indicates the time of permeabilization. (g) Histograms of swimming speed,  
353  $1.51 \pm 0.34 \mu\text{m s}^{-1}$  before permeabilization (live cells) and  $1.30 \pm 0.21 \mu\text{m s}^{-1}$  after  
354 permeabilization (ghosts), (mean  $\pm$  SD, n = 24).  
355

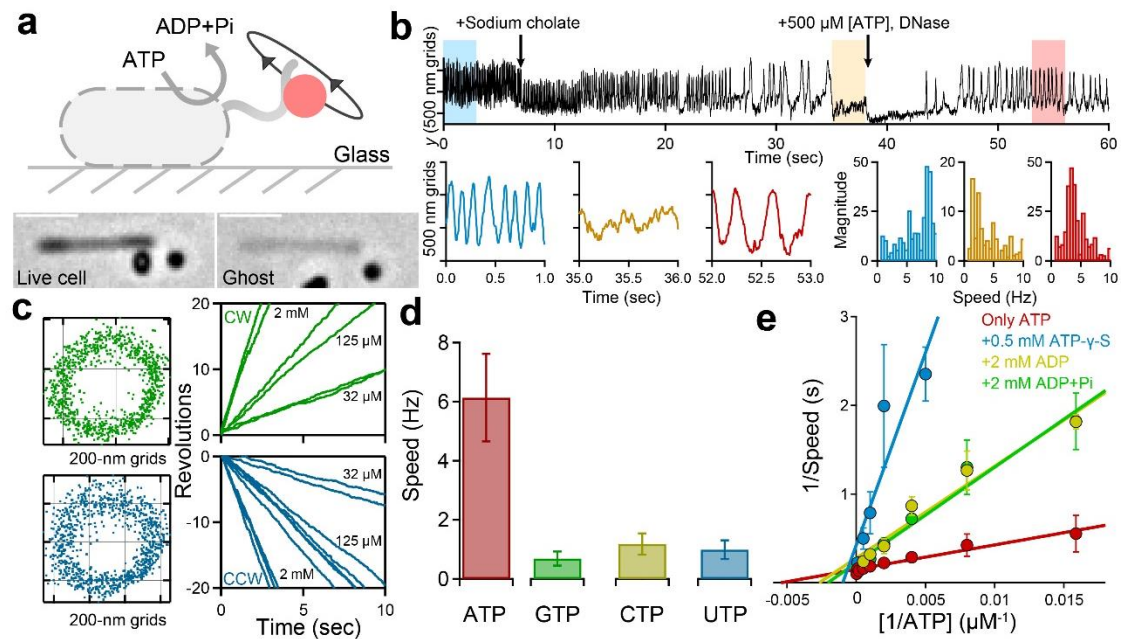

356

357 **Figure 2 Visualization of motor rotation in ghosts, via beads**  
 358 **attached to archaeallar filaments**

359 (a) Schematic of experimental setup (top) and phase-contrast images of a live  
 360 cell (lower left) becoming a ghost (lower right). Scale bar, 5  $\mu\text{m}$ . (b) Top: Time  
 361 course of bead location ( $y$ -coordinate) during ghost preparation. Bottom: Shaded  
 362 sections (top) are expanded (left); with corresponding speed distributions by  
 363 Fourier transform analysis (right), using the same colours as top. Blue shows the  
 364 live cell, orange the motor stopped after treatment with detergent, red the motor  
 365 re-activated after addition of ATP. Rotation cannot be measured during media  
 366 exchange time,  $\sim 10$  s (Data from Supplementary Video 4). (c) Left:  $x$ - $y$  plots of  
 367 locations of two different beads attached to archaeallar filaments. Green and blue  
 368 represent CW and CCW rotation, respectively. Right: Angle vs time for [ the same  
 369 two/similar (delete whichever is not true) ] beads. The slopes decrease in  
 370 proportion to  $[\text{ATP}]$  in both directions, indicating ATP-coupled rotation. (d)

371 Rotation rate for different nucleotide triphosphates at 10 mM. The mean  $\pm$  SD  
372 were  $6.14 \pm 1.48$  Hz for ATP (n = 43),  $0.69 \pm 0.24$  Hz for GTP (n = 30),  $1.18 \pm$   
373  $0.36$  Hz for CTP (n = 32), and  $0.99 \pm 0.32$  Hz for UTP (n = 29). (e) Lineweaver-  
374 Burk plot of rotation rate and inhibitors. Blue, green, ocher, and red represent  
375 data with 2 mM ADP (n = 140), 2 mM ADP+Pi (n = 114), 0.5 mM ATP- $\gamma$ -S (n =  
376 118), and without inhibitors (n = 345), respectively. Data are representative of  
377 three independent experiments.

378

379

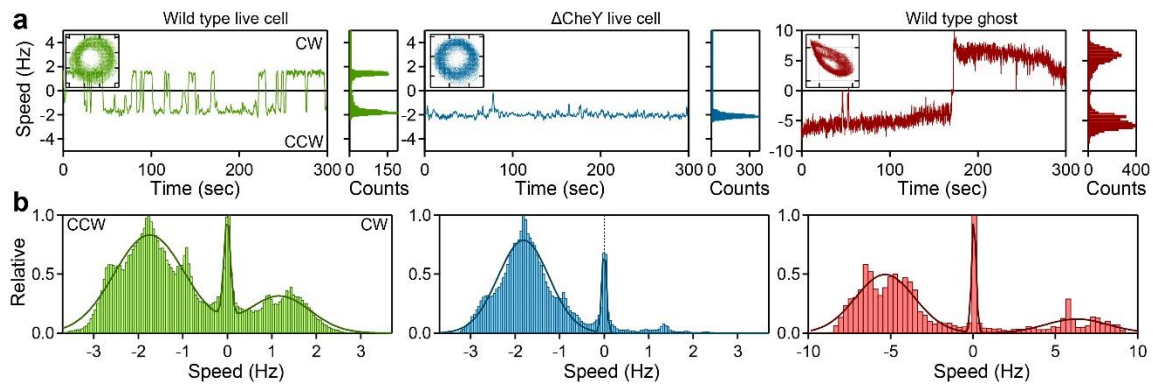

380

### 381 **Figure 3 Archaeal CheY-mediated motor switching**

382 (a) *Left*: Representative time course of rotation rate for 5 min, using 970 nm bead  
383 in wild type- and  $\Delta$ CheY live cells, and 500 nm bead in wild type ghosts. Positive  
384 and negative speeds represent CW and CCW rotation, respectively. *Inset*: y-x  
385 plots of bead rotation. Grids represent 500 nm. *Right*: Histogram of rotation rate  
386 of each cell. (b) Population histograms of rotation rate. The solid line represents  
387 a Gaussian distribution, where the peak and SD were  $1.17 \pm 0.31$  Hz for CW  
388 rotation and  $1.75 \pm 0.79$  Hz for CCW rotation in wild type cells (46 cells);  $1.81 \pm$   
389  $0.57$  Hz for CCW rotation in the  $\Delta$ CheY live cells (54 cells); and  $6.31 \pm 1.90$  Hz  
390 for CW rotation and  $5.34 \pm 1.79$  Hz for CCW rotation in wild type ghosts (28 cells).  
391 Data are representative of two independent experiments.

392

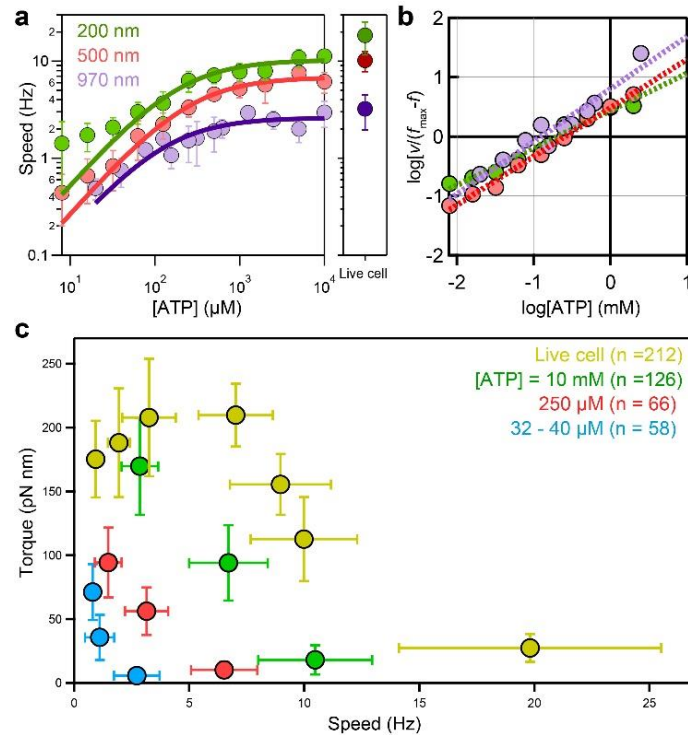

### 393 **Figure 4 ATP- and load-dependent archaeal motor rotation**

394 (a) Rotation rates of 200 (green), 500 (red) and 970 nm beads (blue) attached to  
 395 archaeellar filaments, vs [ATP]. The solid lines show a fit to the Michaelis-Menten  
 396 equation  $\frac{f_{max} \times [ATP]}{K_m + [ATP]}$ ; where  $f_{max}$  and  $K_m$  are 10.3 Hz, 188 μM for 200 nm beads ( $n$   
 397 = 287), 6.8 Hz and 249 μM for 500 nm beads ( $n$  = 438), and 2.6 Hz and 132 μM  
 398 for 1000 nm beads ( $n$  = 303). *Right*: corresponding rotation rates of live cells;  
 399  $18.47 \pm 6.86$  Hz for 200 nm beads ( $n$  = 19),  $10.17 \pm 2.39$  Hz for 500 nm beads ( $n$   
 400 = 32) and  $3.22 \pm 1.27$  Hz for 1000 nm beads ( $n$  = 72). (b) A Hill plot of the same  
 401 data. The Hill coefficient, determined from the slope of the plots, was 0.63 for 200  
 402 nm beads, 0.82 for 500 nm beads, and 0.89 for 970 nm beads. (c) Torque vs  
 403 speed (mean  $\pm$  SD), of live cells and ghosts at various [ATP]. Torque was  
 404 estimated as  $T = 2\pi f \xi$ , where  $f$  is rotation speed and  $\xi = 8\pi\eta a^3 + 6\pi\eta a r^2$  the viscous  
 405 drag coefficient of the bead.  $\xi$  was varied by using bead size ( $d = 2a = 200, 500,$

406 970 nm) and viscosity ( $\eta = 2.5, 3.9, 7.2$  mPa·s in buffer, 5% and 10% Ficoll  
407 respectively).  $r$  is the major axis of the ellipse describing the orbit of the bead  
408 center. [ATP] and number of cells are indicated.



## 409 **References**

- 410 1 Miyata, M. *et al.* Tree of motility - A proposed history of motility systems in the  
411 tree of life. *Genes to cells : devoted to molecular & cellular mechanisms* **25**, 6-21,  
412 doi:10.1111/gtc.12737 (2020).
- 413 2 Jarrell, K. F. & McBride, M. J. The surprisingly diverse ways that prokaryotes  
414 move. *Nature reviews. Microbiology* **6**, 466-476, doi:10.1038/nrmicro1900  
415 (2008).
- 416 3 Albers, S. V. & Jarrell, K. F. The Archaeum: An Update on the Unique Archaeal  
417 Motility Structure. *Trends in microbiology* **26**, 351-362,  
418 doi:10.1016/j.tim.2018.01.004 (2018).
- 419 4 Kinoshita, Y. & Nishizaka, T. Cross-kymography analysis to simultaneously  
420 quantify the function and morphology of the archaeum. *Biophysics and*  
421 *physicobiology* **15**, 121-128, doi:10.2142/biophysico.15.0\_121 (2018).
- 422 5 Reindl, S. *et al.* Insights into FlaI functions in archaeal motor assembly and  
423 motility from structures, conformations, and genetics. *Molecular cell* **49**, 1069-  
424 1082, doi:10.1016/j.molcel.2013.01.014 (2013).
- 425 6 Streif, S., Staudinger, W. F., Marwan, W. & Oesterhelt, D. Flagellar rotation in the  
426 archaeon *Halobacterium salinarum* depends on ATP. *Journal of molecular*  
427 *biology* **384**, 1-8, doi:10.1016/j.jmb.2008.08.057 (2008).
- 428 7 Gibbons, B. H. & Gibbons, I. R. Flagellar movement and adenosine  
429 triphosphatase activity in sea urchin sperm extracted with triton X-100. *The*  
430 *Journal of cell biology* **54**, 75-97, doi:10.1083/jcb.54.1.75 (1972).
- 431 8 Kinoshita, Y. *et al.* Unitary step of gliding machinery in *Mycoplasma mobile*.  
432 *Proceedings of the National Academy of Sciences of the United States of America*  
433 **111**, 8601-8606, doi:10.1073/pnas.1310355111 (2014).
- 434 9 Uenoyama, A. & Miyata, M. Gliding ghosts of *Mycoplasma mobile*. *Proceedings*  
435 *of the National Academy of Sciences of the United States of America* **102**, 12754-  
436 12758, doi:10.1073/pnas.0506114102 (2005).
- 437 10 Rudolph, J. & Oesterhelt, D. Deletion analysis of the che operon in the archaeon  
438 *Halobacterium salinarium*. *Journal of molecular biology* **258**, 548-554,  
439 doi:10.1006/jmbi.1996.0267 (1996).
- 440 11 Briegel, A. *et al.* Structural conservation of chemotaxis machinery across Archaea  
441 and Bacteria. *Environmental microbiology reports* **7**, 414-419, doi:10.1111/1758-  
442 2229.12265 (2015).
- 443 12 Makarova, K. S., Yutin, N., Bell, S. D. & Koonin, E. V. Evolution of diverse cell  
444 division and vesicle formation systems in Archaea. *Nature reviews. Microbiology*



- 445           **8**, 731-741, doi:10.1038/nrmicro2406 (2010).
- 446    13       Schlesner, M. *et al.* Identification of Archaea-specific chemotaxis proteins which  
447       interact with the flagellar apparatus. *BMC microbiology* **9**, 56, doi:10.1186/1471-  
448       2180-9-56 (2009).
- 449    14       Banerjee, A. *et al.* FlaF Is a beta-Sandwich Protein that Anchors the Archaelium  
450       in the Archaeal Cell Envelope by Binding the S-Layer Protein. *Structure (London,*  
451       *England : 1993)* **23**, 863-872, doi:10.1016/j.str.2015.03.001 (2015).
- 452    15       Tsai, C. L. *et al.* The structure of the periplasmic FlaG-FlaF complex and its  
453       essential role for archaellar swimming motility. *Nature microbiology* **5**, 216-225,  
454       doi:10.1038/s41564-019-0622-3 (2020).
- 455    16       Chaudhury, P. *et al.* The nucleotide-dependent interaction of FlaH and FlaI is  
456       essential for assembly and function of the archaelium motor. *Molecular*  
457       *microbiology* **99**, 674-685, doi:10.1111/mmi.13260 (2016).
- 458    17       Kinosita, Y., Uchida, N., Nakane, D. & Nishizaka, T. Direct observation of  
459       rotation and steps of the archaelium in the swimming halophilic archaeon  
460       *Halobacterium salinarum*. *Nature microbiology* **1**, 16148,  
461       doi:10.1038/nmicrobiol.2016.148 (2016).
- 462    18       Scharf, B. E., Fahrner, K. A., Turner, L. & Berg, H. C. Control of direction of  
463       flagellar rotation in bacterial chemotaxis. *Proceedings of the National Academy of*  
464       *Sciences* **95**, 201-206, doi:10.1073/pnas.95.1.201 (1998).
- 465    19       Berg, H. C. & Anderson, R. A. Bacteria swim by rotating their flagellar filaments.  
466       *Nature* **245**, 380-382, doi:10.1038/245380a0 (1973).
- 467    20       Ghosh, A., Hartung, S., van der Does, C., Tainer, J. A. & Albers, S. V. Archaeal  
468       flagellar ATPase motor shows ATP-dependent hexameric assembly and activity  
469       stimulation by specific lipid binding. *The Biochemical journal* **437**, 43-52,  
470       doi:10.1042/bj20110410 (2011).
- 471    21       Ripstein, Z. A., Vahidi, S., Houry, W. A., Rubinstein, J. L. & Kay, L. E. A  
472       processive rotary mechanism couples substrate unfolding and proteolysis in the  
473       ClpXP degradation machinery. *eLife* **9**, doi:10.7554/eLife.52158 (2020).
- 474    22       Iwata, S., Kinosita, Y., Uchida, N., Nakane, D. & Nishizaka, T. Motor torque  
475       measurement of *Halobacterium salinarum* archaellar suggests a general model for  
476       ATP-driven rotary motors. *Communications biology* **2**, 199, doi:10.1038/s42003-  
477       019-0422-6 (2019).
- 478    23       Chaudhury, P., van der Does, C. & Albers, S. V. Characterization of the ATPase  
479       FlaI of the motor complex of the *Pyrococcus furiosus* archaelium and its  
480       interactions between the ATP-binding protein FlaH. *PeerJ* **6**, e4984,

- 481 doi:10.7717/peerj.4984 (2018).
- 482 24 McCallum, M. *et al.* Multiple conformations facilitate PilT function in the type  
483 IV pilus. *Nature communications* **10**, 5198, doi:10.1038/s41467-019-13070-z  
484 (2019).
- 485 25 Uchihashi, T., Iino, R., Ando, T. & Noji, H. High-speed atomic force microscopy  
486 reveals rotary catalysis of rotorless F<sub>1</sub>-ATPase. *Science (New York, N.Y.)* **333**, 755-  
487 758, doi:10.1126/science.1205510 (2011).
- 488 26 McCallum, M., Tammam, S., Khan, A., Burrows, L. L. & Howell, P. L. The  
489 molecular mechanism of the type IVa pilus motors. *Nature communications* **8**,  
490 15091, doi:10.1038/ncomms15091 (2017).
- 491 27 Cross, R. L., Grubmeyer, C. & Penefsky, H. S. Mechanism of ATP hydrolysis by  
492 beef heart mitochondrial ATPase. Rate enhancements resulting from cooperative  
493 interactions between multiple catalytic sites. *The Journal of biological chemistry*  
494 **257**, 12101-12105 (1982).
- 495 28 Reissmann, S., Parnot, C., Booth, C. R., Chiu, W. & Frydman, J. Essential  
496 function of the built-in lid in the allosteric regulation of eukaryotic and archaeal  
497 chaperonins. *Nature structural & molecular biology* **14**, 432-440,  
498 doi:10.1038/nsmb1236 (2007).
- 499 29 Nord, A. L., Sowa, Y., Steel, B. C., Lo, C. J. & Berry, R. M. Speed of the bacterial  
500 flagellar motor near zero load depends on the number of stator units. *Proceedings*  
501 *of the National Academy of Sciences of the United States of America* **114**, 11603-  
502 11608, doi:10.1073/pnas.1708054114 (2017).
- 503 30 Yasuda, R., Noji, H., Yoshida, M., Kinosita, K., Jr. & Itoh, H. Resolution of  
504 distinct rotational substeps by submillisecond kinetic analysis of F<sub>1</sub>-ATPase.  
505 *Nature* **410**, 898-904, doi:10.1038/35073513 (2001).
- 506 31 Meacci, G. & Tu, Y. Dynamics of the bacterial flagellar motor with multiple  
507 stators. *Proceedings of the National Academy of Sciences of the United States of*  
508 *America* **106**, 3746-3751, doi:10.1073/pnas.0809929106 (2009).
- 509 32 Kinosita, Y., Miyata, M. & Nishizaka, T. Linear motor driven-rotary motion of a  
510 membrane-permeabilized ghost in *Mycoplasma mobile*. *Scientific reports* **8**,  
511 11513, doi:10.1038/s41598-018-29875-9 (2018).
- 512 33 Sowa, Y., Steel, B. C. & Berry, R. M. A simple backscattering microscope for fast  
513 tracking of biological molecules. *The Review of scientific instruments* **81**, 113704,  
514 doi:10.1063/1.3495960 (2010).
- 515 34 Dyll-Smith, M. *The Halohandbook v7.3.* (2015).
- 516 35 Hosu, B. G., Nathan, V. S. & Berg, H. C. Internal and external components of the

- 517 bacterial flagellar motor rotate as a unit. *Proceedings of the National Academy of*  
518 *Sciences of the United States of America* **113**, 4783-4787,  
519 doi:10.1073/pnas.1511691113 (2016).
- 520 36 Sugawa, M. *et al.* Circular orientation fluorescence emitter imaging (COFEI) of  
521 rotational motion of motor proteins. *Biochemical and biophysical research*  
522 *communications* **504**, 709-714, doi:10.1016/j.bbrc.2018.08.178 (2018).
- 523 37 Moffitt, J. R. *et al.* Intersubunit coordination in a homomeric ring ATPase. *Nature*  
524 **457**, 446-450, doi:10.1038/nature07637 (2009).
- 525 38 Sowa, Y. *et al.* Direct observation of steps in rotation of the bacterial flagellar  
526 motor. *Nature* **437**, 916-919, doi:10.1038/nature04003 (2005).
- 527 39 Alam, M. & Oesterhelt, D. Morphology, function and isolation of halobacterial  
528 flagella. *Journal of molecular biology* **176**, 459-475, doi:10.1016/0022-  
529 2836(84)90172-4 (1984).
- 530 40 Trachtenberg, S., Galkin, V. E. & Egelman, E. H. Refining the structure of the  
531 *Halobacterium salinarum* flagellar filament using the iterative helical real space  
532 reconstruction method: insights into polymorphism. *Journal of molecular biology*  
533 **346**, 665-676, doi:10.1016/j.jmb.2004.12.010 (2005).
- 534 41 Veigel, C. & Schmidt, C. F. Moving into the cell: single-molecule studies of  
535 molecular motors in complex environments. *Nature reviews. Molecular cell*  
536 *biology* **12**, 163-176, doi:10.1038/nrm3062 (2011).
- 537 42 Mishra, M. *et al.* In vitro contraction of cytokinetic ring depends on myosin II but  
538 not on actin dynamics. *Nature cell biology* **15**, 853-859, doi:10.1038/ncb2781  
539 (2013).
- 540 43 Allers, T., Ngo, H. P., Mevarech, M. & Lloyd, R. G. Development of additional  
541 selectable markers for the halophilic archaeon *Haloferax volcanii* based on the  
542 *leuB* and *trpA* genes. *Applied and environmental microbiology* **70**, 943-953,  
543 doi:10.1128/aem.70.2.943-953.2004 (2004).
- 544 44 Sowa, Y., Hotta, H., Homma, M. & Ishijima, A. Torque-speed relationship of the  
545 Na<sup>+</sup>-driven flagellar motor of *Vibrio alginolyticus*. *Journal of molecular biology*  
546 **327**, 1043-1051, doi:10.1016/s0022-2836(03)00176-1 (2003).
- 547 45 Svoboda, K. & Block, S. M. Optical trapping of metallic Rayleigh particles.  
548 *Optics letters* **19**, 930-932, doi:10.1364/ol.19.000930 (1994).
- 549  
550  
551  
552
